# Supplementary material for: A carbon nanotube tape for serial-section electron microscopy of brain ultrastructure
Source: PubMed Central journal article supplement (PMC5789869; doi:10.1038/s41467-017-02768-7), 2018-01-30
Supplement: 41467_2017_2768_MOESM1_ESM.pdf [file 41467_2017_2768_MOESM1_ESM.pdf]

## 1 **Supplementary Note 1. Drawbacks of carbon coated (cc)-Kapton tape**

2 We evaluated the cc-Kapton tape quantitatively to understand how to meet the  
3 requirements of an ATUMtome tape. The surface of Kapton tape is hydrophobic and  
4 non-conductive, and shows severe charging during SEM imaging under high-vacuum  
5 conditions. Conductive carbon coating resolves this problem<sup>1</sup>. We embedded rat brain  
6 tissue in epoxy resin (Durcupan ACM, Sigma-Aldrich, St. Louis, U.S.A.) using a  
7 modified heavy metal staining (mHMS) histology protocol (Table 1) and obtained serial  
8 ultrathin sections of 50 nm-thickness using the ATUMtome (RMC Boeckeler, Tucson,  
9 AZ, U.S.A.). Unless otherwise stated, we used these sections for examination. We  
10 observed that the hydrophobic tape surface of cc-Kapton Tape (RMC Boeckeler,  
11 Tucson, AZ, U.S.A.) generates copious section wrinkles during section collection  
12 (Supplementary Fig. 1). This was overcome by hydrophilization of the tape surface by  
13 plasma discharge treatment (see below, Supplementary Fig. 1). Carbon coating of the  
14 tape was necessary to eliminate imaging-induced charging. However, we occasionally  
15 found significant charging problems affecting image quality, due to randomly occurring  
16 even lower conductance areas that we attributed to the variable thickness of the carbon  
17 coating, including continuously drifting images (Supplementary Fig. 1), as well as its  
18 relatively high and variant tape surface sheet resistance ( $19.2/107/6,530 \text{ M}\Omega \square^{-1}$  for  
19 three samples of cc-Kapton tape, RMC Boeckeler). In addition, we often found  
20 scratches on the tape surface, likely generated during the tape production process  
21 (Supplementary Fig. 1), which negatively impacted image data capture. Moreover, the  
22 coated carbon layer is partially lost with plasma discharge treatment (Supplementary  
23 Fig. 1). It was examined with a home-coated carbon Kapton tape of carbon evaporated  
24 10 nm thick deposit layer which allowed us to measure the resistance for its relatively  
25 low sheet resistance (19.3 % reduction of conductivity; sheet resistance,  $3367 \pm 516$  and  
26  $4172 \pm 559 \Omega \square^{-1}$  without and with plasma discharge treatment, respectively,  $n=3$  each  
27 cc-Kapton tape; estimated conductance: 5.9 and 4.8  $\text{S m}^{-1}$ , respectively). Alternatively,  
28 carbon coating can be done after section collection on plasma discharge treated carbon  
29 uncoated Kapton tape<sup>2,3</sup>, though this is generally to be avoided due to signal loss and  
30 noise generation from the overlying carbon layer, which is especially pronounced when  
31 using in-lens secondary electron (SE) detection (In-lens SE) (Supplementary Fig. 1).  
32 These problems, and the fact that ready-to-use cc-Kapton tape is not supplied in a stable  
33 manner commercially, prompted us to search for a more optimal tape for ATUM. We

34 concluded that the cc-Kapton tape varied in quality and some might not provide good  
35 imaging conditions.

36

### 37 **Supplementary Note 2. Examinations of potential tapes**

38 To find the best replacement of the cc-Kapton tape for ATUM use, we tested many  
39 different tapes: copper foil, 8mm video tape, ITO (indium tin oxide) coated PET,  
40 germanium-coated PET, open-reel and CNT-coated PET tapes (Supplementary Fig. 2,  
41 Supplementary Table 1). We initially thought that the copper foil tape would be a good  
42 choice for the ATUM because of its low resistance ( $0.1 \Omega \square^{-1}$  for  $20 \mu\text{m}$  thick copper  
43 foil). Indeed, we did not notice any charging problems during image acquisition, but the  
44 tape failed to remain flat when subsequently adhered to a silicon wafer for imaging  
45 (Supplementary Fig. 2). The uneven surface made it difficult to focus the microscope  
46 across serial sections. Next, ITO-coated PET tape was tested. ITO is a transparent metal  
47 conductor and is typically used for flat-panel displays and smart windows. We imaged  
48 an EM sample on ITO-coated tape with the In-lens SE and backscattered electron (BSE)  
49 detector (BSD). We found a stripe pattern in the images (Supplementary Fig. 2). The  
50 thin ITO layers on the tape surface likely affect the images as the endogenic signal. The  
51 stripe pattern noise was probably due to cracks of the ITO layer generated at the very  
52 small angle of the ATUMtome tape guide tip end (Supplementary Fig. 2). We also  
53 tested germanium-coated PET film and found the image was fuzzy, especially with the  
54 BSD (Supplementary Fig. 2). We concluded that the tape coated with the conductive  
55 metal substance is not suitable for thin section imaging with the SEM because its strong  
56 endogenic signals may interfere with images.

57

### 58 **Supplementary Note 3. Open reel tape**

59 We then tried the open-reel tape (Supplementary Fig. 2) for ultrathin section  
60 collection with the ATUM. We found that it had a good resilience for the tape guide of  
61 the ATUM (Supplementary Fig. 2) and was easy enough to handle for adherence to the  
62 flat surface of the wafer. We imaged the 50 nm-thick tissue sections on the open reel  
63 tape with In-lens SE and BSD with common acceleration voltage (2 keV and 5 keV,  
64 respectively). We found that the electron micrographs were full of bar-like magnetic  
65 particle noise (Supplementary Fig. 2). It clearly indicated that the open-reel tape has  
66 strong endogenous noise and is not suitable tape for ATUM.

67 Then, we realized that it would be advantageous to analyze electron interaction depth  
68 quantitatively. We tested the EM samples using the In-lens SE detector with different  
69 acceleration voltages (Sigma, Carl Zeiss Microscopy GmbH, Oberkochen, Germany)  
70 (Supplementary Fig. 9) to see whether the image would change with the different  
71 accelerating voltages. We found that the image without the bar-like magnetic particle  
72 noise could be obtained only using 1 keV, but images using 1.5 keV or more led to the  
73 incorporation of magnetic particle signals in the magnetic layer of the tape  
74 (Supplementary Fig. 9). It was due to the larger and deeper interaction volume at higher  
75 acceleration voltages, which was further confirmed using the simulation, Monte Carlo  
76 Simulation of electron trajectory in solids (CASINO)<sup>4</sup> (Supplementary Fig. 9). The SE  
77 is known to be generated on two occasions: at the primary electron incidence into the  
78 block (SE1) and upon the primary electrons back-scattering from the block surface  
79 (SE2)<sup>5</sup>. The SE1 may give information about the surface structure and the SE2 about  
80 the tissue block mainly. Therefore, the BSE trajectory line (red lines in Supplementary  
81 Fig. 9) may be the interaction volume for the generation of SE2. This indicates that it is  
82 essential to keep the electron interaction volume within the tissue section thickness (50  
83 nm), because when the BSE interaction volume reaches the base tape beyond the tissue  
84 section, it incorporates the background endogenous noise from the tape. There are two  
85 ways to minimize this noise: either using an optimally low acceleration voltage for  
86 imaging to restrict the interaction volume depth or using a base tape with low intrinsic  
87 signal (low Z). To estimate the proportion of the signal from a brain section (50 nm-  
88 thick), we divided the number of BSEs reflected only from the section by the number of  
89 all BSEs including those from base tape, signal efficiency for a 50 nm-thick section  
90 (Supplementary Table 2). The values of signal efficiency for a 50 nm-thick section in  
91 different acceleration voltages reasonably indicated a proportion of the real signal from  
92 tissue contained in the image from the open reel tape (Supplementary Fig. 9). Therefore,  
93 we believe that the Monte Carlo simulation reproduced the images that incorporated the  
94 magnetic particle signals on the open-reel tape. These results indicate that imaging with  
95 an acceleration voltage that generates an appropriate interaction volume for a given  
96 section thickness should give the best image results.

97 To see the performance of BSD in our Sigma SEM, we also imaged the same section  
98 using BSD with different acceleration voltages (Supplementary Fig. 9). We found that  
99 images without magnetic particle noise could be obtained using 1-2 keV, and images

100 with 2.5 keV or more increasingly led to the incorporation of magnetic particle signals  
101 (Supplementary Fig. 9). This may indicate that the BSD was not capable of efficiently  
102 detecting the lower energy BSEs, which probably travel deeper in the tissue block and  
103 have likely lost their energy due to travel over the long distance. Therefore, the BSD  
104 tends to image the magnetic particle signals using higher acceleration voltage than with  
105 the In-lens SE, which is designed to detect low energy electrons very efficiently with  
106 the 'Beambooster' of the GEMINI column to accelerate the electrons with an additional  
107 8 keV <sup>6</sup>.

108

#### 109 **Supplementary Note 4. Properties of the CNT-coated PET tape**

110 We examined SEM beam damage on the CNT tape to see the influence on imaging.  
111 Beam damage resistance was studied with direct beam radiation onto the tape surface  
112 with 6.4  $\mu$ s dwell time, 3 nm pixel<sup>-1</sup>, 4k x 4k image size, 8 mm working distance (wd),  
113 60  $\mu$ m aperture and high current mode at different acceleration voltages for imaging  
114 with the BSD. Using a side-mounted Everhart-Thornley detector (sET), which imaged  
115 mainly surface structure, and 3D laser scanning confocal microscope (SCM), which  
116 imaged surface structure in pseudo depth color (VX-250, Keyence Corporation, Osaka,  
117 Japan), we found that the tape showed depression damage, which was probably due to  
118 further crosslinking of the overcoat layer. The damage was well correlated with  
119 acceleration voltage strength and depression depth measured with the SCM  
120 (Supplementary Fig. 3). The PET film itself was stretched during manufacture to reduce  
121 deformation by heat, but the overcoat or hard coat layers were not. Therefore, the  
122 polymer used in the overcoat layer may generate additional cross-linkage with the heat  
123 from the SEM beam. On the other hand, we found that the cc-Kapton tape showed a  
124 slight expansion (Supplementary Fig. 3) and the expansion height was well correlated  
125 with acceleration voltage strength (Supplementary Fig. 3). The beam damage depression  
126 depth of the CNT tape was deep, especially for the high acceleration voltages, but only  
127 a fraction of electrons may reach the base tape beyond the 50 nm-thick tissue section.  
128 Therefore, we investigated the depression depth after imaging the tissue section.

129 We captured images of the 50 nm-thick tissue sections with varied acceleration  
130 voltage strengths and dwell times (Supplementary Figs. 4, 5) and analyzed the beam  
131 damage using the depression depth in order to understand the possible mechanism of the  
132 depression of the CNT tape and any influence on image quality. As we predicted, the

133 damage depression depth was much smaller than the ones directly on the tape (the  
134 depression depth of tissue section with BSD/the depression depth of CNT tape surface  
135 with BSD: average  $53.2 \pm 8.9\%$ ; the depression depth of tissue section with In-lens  
136 SE/the depression depth of CNT tape surface with BSD: average  $63.5 \pm 6.6\%$  for 6 keV,  
137 5 keV, 4 keV and 3 keV). We found that the depth was determined mainly by  
138 acceleration voltage strength significantly ( $P < 0.01$ ) (Supplementary Figs. 4, 5). The  
139 depression depth was quite similar between BSD and In-lens SE imaging, although the  
140 electron dose for the BSD imaging was about 5 times larger than that of the In-lens SE  
141 for the aperture size difference ( $60 \mu\text{m}$  vs  $20 \mu\text{m}$ ) (Supplementary Figs. 4, 5). There was  
142 only a faint depression using an acceleration voltage of 2 keV or less, 17 – 67 nm depth  
143 (Supplementary Figs. 4, 5). It seems probable that primary electrons generated the  
144 depression and the depth of the electrons was determined by the acceleration voltage  
145 strength, which was predicted by the Monte Carlo simulation, which was tuned to the  
146 images on the open reel tape (Supplementary Fig. 9, blue lines). The primary electrons  
147 likely produced further cross-linking of the over-coat polymer of the tape surface  
148 directly under the tissue section, as well as the epoxy resin where the tissue was  
149 embedded, causing the depression. Indeed, we also found similar, but smaller  
150 depression damage with the 50 nm-thick tissue section on cc-Kapton tape (data not  
151 shown), where the Kapton tape itself showed expansion beam damage (Supplementary  
152 Fig. 3). These results indicated that the beam damage depression depth could be little  
153 especially for imaging the tissue section on the CNT tape with low acceleration voltage.

154 Next, we determined whether the seam between tiled images was noticeable after  
155 stitching. We captured  $2 \times 2$  tiled images with  $3 \text{ nm pixel}^{-1}$ ,  $3.2 \mu\text{s}$  dwell time,  $4096 \times$   
156  $4096$  pixel images at 7.3 mm working distance in 5 keV using BSD with our Sigma-  
157 Atlas5 SEM (Supplementary Fig. 8). Image stitching was easily and seamlessly  
158 processed (Supplementary Fig. 8). We verified that the depression damage by the  
159 electron beam during imaging did not cause subsequent problems in stitching.

160 Mechanical strength of the CNT tape was examined. The tape is stretched, bent and  
161 wetted during ATUM operation, so the tape for the ATUM should be mechanically  
162 strong. The CNT tape was known to be strong enough to withstand bending up to  $180^\circ$   
163 with 2.3 mm radius of curvature (Supplementary Fig. 2), temperatures up to  $85^\circ\text{C}$ ,  
164 humidity up to 85%, and high vacuum conditions. The CNT tape showed no change in  
165 its structure after passing through the water in the diamond knife boat during the

166 ATUMtome process. It showed no significant change over long term shelf storage,  
167 although PET in the base of the tape may become yellowish from ultraviolet irradiation.  
168 Therefore, it is better to keep it shaded. We believe that the CNT tape is sufficiently  
169 strong for ATUM use.

170 Chemical strength was examined, because tissue sections on the tape may be  
171 processed with histological procedures. We tested water, 0.05 M Tris-HCl buffered  
172 saline (TBS) with 0.1% of triton X-100, 1% uranyl acetate solution, lead citrate staining  
173 solution, antiserum, ethanol, isopropyl alcohol and plasma discharge treatment. The  
174 tape was unaltered, at least for imaging use.

175 We analyzed surface structure of the CNT tape. The tape surface has to be smooth and  
176 flat, so as not to influence the image. Using the BSD, In-lens SE and sET in Sigma  
177 SEM, we found that the CNT coating was relatively uniform (Supplementary Figs. 3, 6)  
178 and it did not show up at all in the tissue images of 50 nm-thick sections (Figs. 2a, b, 3,  
179 Supplementary Figs. 4, 5, 6). The CNTs are affixed on the entire tape surface to make  
180 uniform surface resistance across the entire tape length (Fig. 1b). Using the In-lens SE  
181 detector in the Sigma SEM, which captured the surface shape, only thick CNTs were  
182 visible on the surface of the tape (Supplementary Fig. 6). In SEMs with stage bias  
183 potential, which efficiently increases signals from shallow tissue depth<sup>7,8</sup>, the CNTs  
184 were clearly visible on the tape surface using an In-lens SE detector (GeminiSEM  
185 300/MultiSEM 505, Carl-Zeiss Microscopy GmbH, Oberkochen, Germany)  
186 (Supplementary Fig. 6), and in relatively low contrast using a BSD optimized for low  
187 acceleration voltage (OnPoint BSD, Gatan, Inc., Pleasanton, CA, U.S.A.) in the  
188 GeminiSEM 300 (Supplementary Fig. 6). The CNTs varied in diameter (10 – 40 nm)  
189 and some of which, especially thick ones, were shown through very thin tissue sections  
190 ( $\leq$  25-30 nm thickness) or with 50 nm-thick plastic sections lacking brain tissue (not  
191 shown), but not through 50 nm-thick tissue sections (Supplementary Fig. 6). We  
192 concluded that the surface of the CNT tape was sufficiently smooth and flat for SEM  
193 imaging with thin sections ( $>$ 30 nm-thick).

194 In contrast, the surface of the cc-Kapton tape was bumpy and scratches were  
195 frequently found (Supplementary Figs. 1, 3, 7). The irregular surface may be caused by  
196 non-uniform affixed carbon deposition. Particles ( $\sim$ 10 nm diameter), which could be  
197 dirt produced during the pre-washing process with isopropanol of the Kapton tape, were

198 also attached to the tape surface (Supplementary Figs. 1, 3, 7), which may slightly affect  
199 images obtained with the In-lens SE, but not with the BSD (Supplementary Fig. 7).  
200

201 **Supplementary Methods**

202

203 **Simulation analysis**

204 Monte Carlo simulations of electron trajectories for SEM imaging have been reported  
205 previously <sup>47,68</sup>. We simulated the electron trajectory for backscattered imaging in SEM  
206 with CASINO (ver. 2.48) <sup>69</sup>, by using the atomic fraction value of epoxy resin (nH =  
207 0.53, nC = 0.35, nO = 0.12 <sup>68</sup>) without metals used for staining process, because most of  
208 the brain tissue was composed of only epoxy resin without any stained membrane  
209 throughout the ultrathin section thickness. The electron beam energies were set at 1.0–  
210 6.0 keV with a step of 0.5 keV, and the beam radius was set at 10 nm. In the present  
211 simulation, 3,000 electron trajectories were displayed for each beam energy.

212

213 **Statistics**

214 We used Kruskal-Wallis test to compare beam damage depression depth of different  
215 acceleration voltage or dwell time conditions (Supplementary Figs. 4, 5).

216



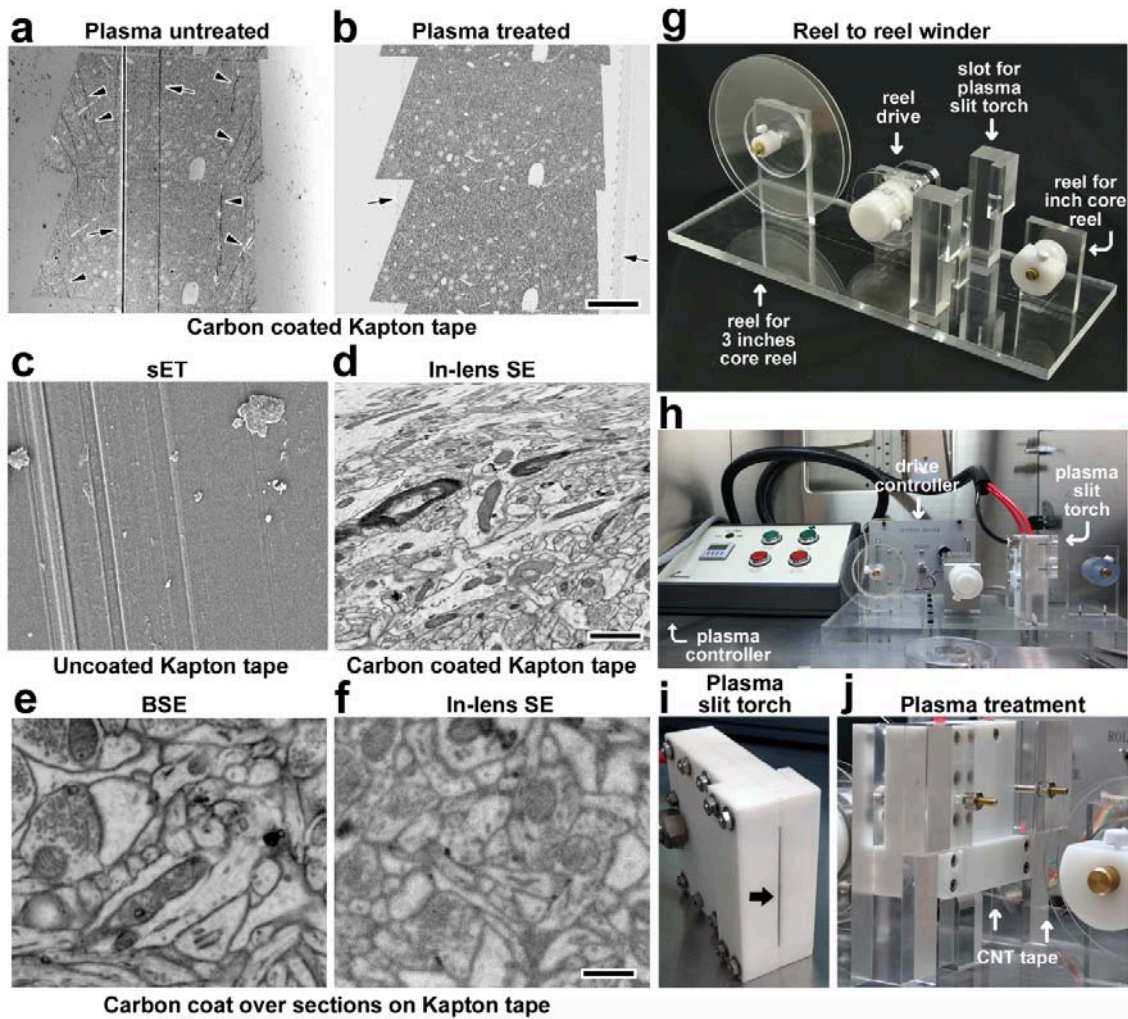

218

219 Supplementary Figure 1

220 Problematic features of Kapton tape and solutions using carbon coating and plasma  
 221 discharge treatment

222 **a.** Non-plasma-treated cc-Kapton tape with collected serial ultrathin sections showing  
 223 extensive wrinkles (arrow heads). Scratches on the tape surface were frequently seen  
 224 (arrows), and they negatively impacted image data capture. **b.** Plasma-treated cc-Kapton  
 225 tape containing ultrathin sections without wrinkles. Scratches on the tape surface were  
 226 frequently seen (arrows). Scale, 100  $\mu\text{m}$ , is also for (a). **c.** Scratches (arrows) are  
 227 frequently seen on the surface of uncoated Kapton tape. **d.** Image obtained with a BSD  
 228 generates continuously drifting images (evident in the upper part) due to charging. Scale,  
 229 2  $\mu\text{m}$ , is also for (c). **e, f.** Images with high magnification of a tissue section on Kapton

230 tape with a carbon layer deposited on top of the section shows good ultrastructure with  
231 the BSD (e) and a fuzzy image taken with the In-lens SE detector (f). Scale,  $0.5 \mu\text{m}$ , is  
232 also for (e). g. The reel-to-reel motorized winder for atmospheric pressure plasma glow  
233 discharge treatment. h. The atmospheric pressure plasma glow discharge system. i.  
234 Bottom view of the plasma slit torch head. Glowing plasma discharge shines through  
235 the center of narrow slit (arrow). j. Plasma slit torch head and the CNT tape (arrows).  
236

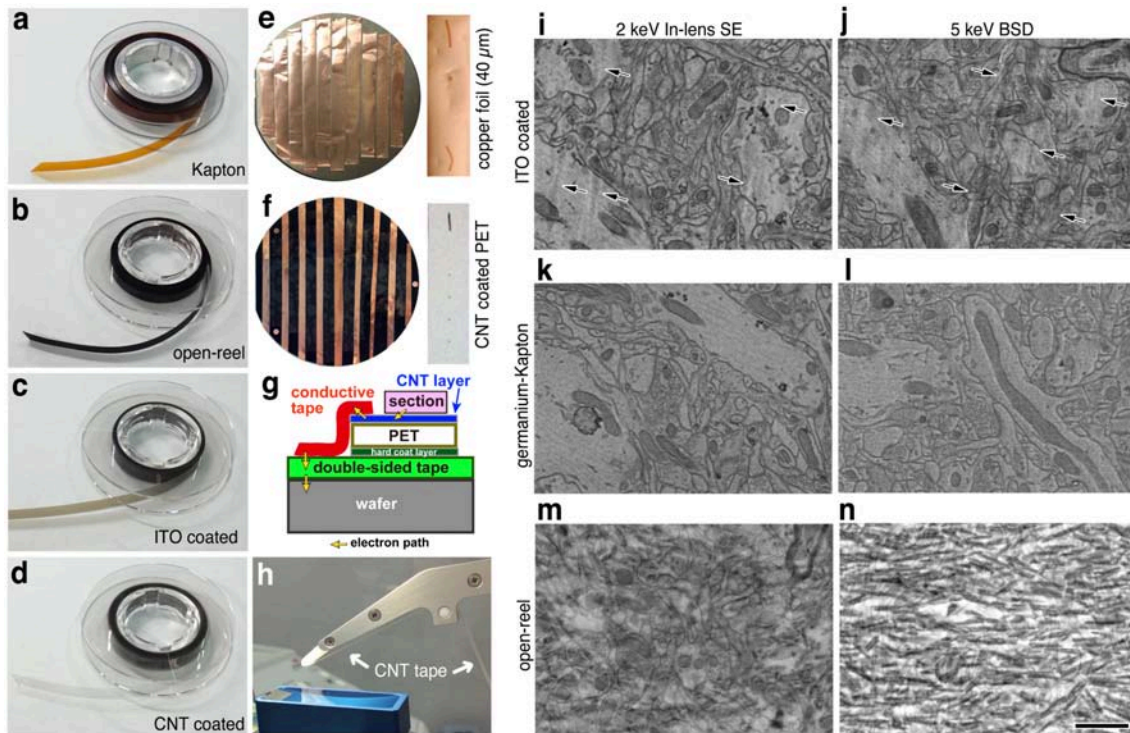

238

239 Supplementary Figure 2

240 Wide variety of tapes examined for ATUM

241 **a.** Kapton tape. **b.** open-reel tape. **c.** ITO-coated PET tape. **d.** CNT-coated PET tape. **e.**

242 Serial ultrathin sections on strips of copper foil tape glued on a 4-inch silicon wafer.

243 Ribbons of the serial ultrathin sections from a tissue block on copper foil (right). **f.**

244 Serial ultrathin sections on strips of the CNT-coated PET tape (black strips) glued on a

245 4-inch silicon wafer. Conductive copper foil tape thin strips are adhered between the

246 CNT-coated PET tape to ground the CNT layer to the wafer. Serial ultrathin sections

247 collected on the CNT tape (right). **g.** Schematic drawing shows side view of the CNT

248 tape with tissue section on the wafer. Possible electron pathway from the tissue section

249 to wafer via the conductive CNT tape (yellow arrows). **h.** Tape guide tip of the250 ATUMtome. **i-n,** Images of mHMS-treated brain tissue captured with the In-lens SE251 detector at 2 keV (**i, k, m**), or the BSD at 5 keV (**j, l, n**) on ITO-coated PET tape (**i, j**),252 germanium-coated tape (**k, l**), or open-reel tape (**m, n**). Cracks of the ITO layer253 generated at the ATUMtome tape guide tip end are indicated by arrows in **i, j**. Scale in254 (**n**), 1  $\mu\text{m}$ , is also for (**i-l**).

255

256

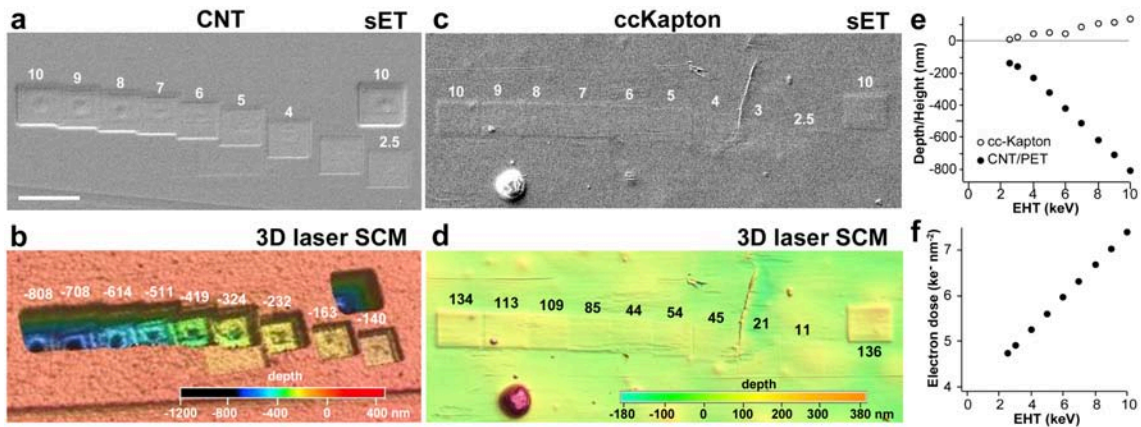

257

258 Supplementary Figure 3

259 SEM imaging causes beam damage on the CNT and cc-Kapton tape

260 **a.** Low magnification image captured with the sET detector shows a depression on the  
 261 CNT tape surface by images captured with the BSD for 4096 x 4096 pixel image size,  
 262 6.4  $\mu$ s dwell time, 3 nm pixel<sup>-1</sup> with different acceleration voltages. Digits above the  
 263 depressed square show the acceleration voltage value (keV) during imaging. Scale, 20  
 264  $\mu$ m, is also for (c-d). **b.** The surface profile obtained with 3D laser SCM shows the  
 265 depression depth clearly. Depression depth is indicated above the depression square. **c.**  
 266 Low magnification image captured with the sET detector shows expansion of the cc-  
 267 Kapton tape surface where the images were captured with the BSD. Digits above the  
 268 expanded square show the acceleration voltage value (keV) during imaging. **d.** The  
 269 surface profile obtained with 3D laser SCM shows the expansion height clearly. The  
 270 expansion height is indicated above the depression square. **e.** Depression  
 271 depth/expansion height is well correlated with acceleration voltage size. **f.** Electron dose  
 272 of acceleration voltages.



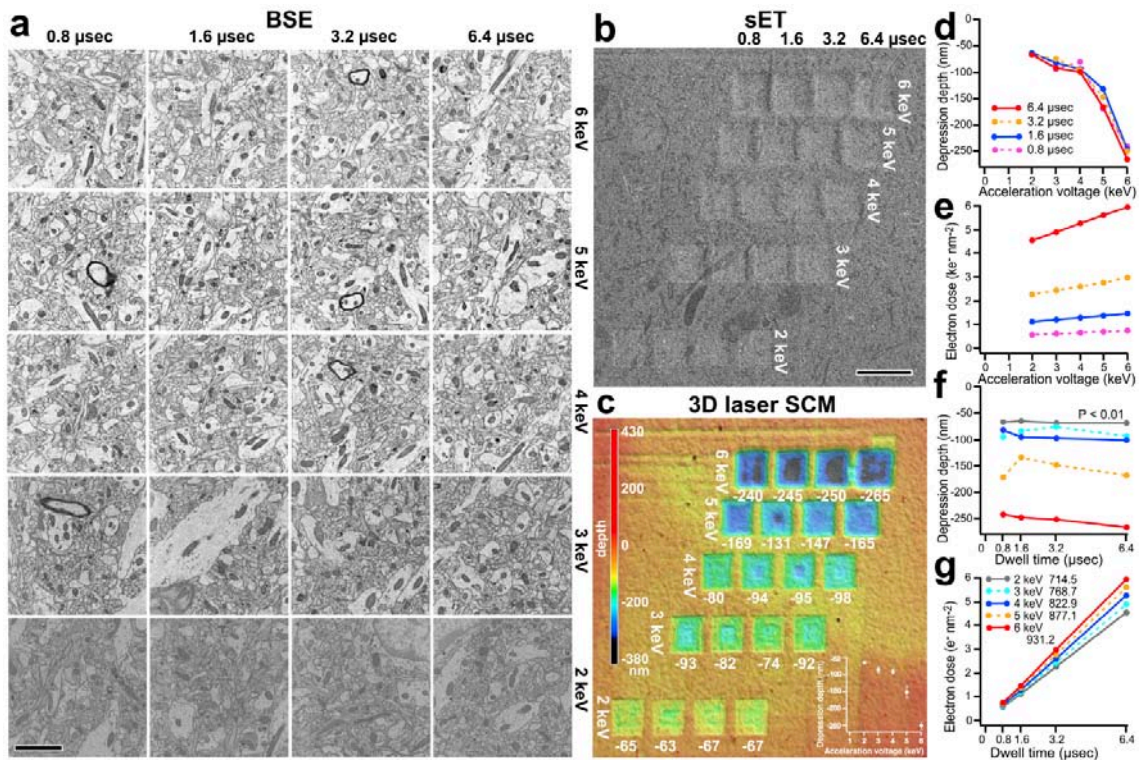

273

274 Supplementary Figure 4

275 Image quality varies with different acceleration voltage strengths and dwell times using  
276 a BSD with a single beam SEM.

277 **a.** Images of mHMS-treated brain tissue are captured with a BSD for 2048 x 2048 pixel  
278 image size, 3 nm pixel<sup>-1</sup>, aperture 60  $\mu$ m, with different acceleration voltage strengths (2  
279 keV - 6 keV) and dwell times (0.8  $\mu$ s - 6.4  $\mu$ s) using an optimized working distance (7.6  
280 mm: 6 keV, 7.7 mm: 5 keV and 4 keV, 7.8 mm: 3 keV, 7.9 mm: 2 keV) on the CNT  
281 tape. Scale, 2  $\mu$ m. **b.** Low magnification image captured with the sET detector shows  
282 depression of the tissue section surface by images captured with the BSD with different  
283 acceleration voltages (2 - 6 keV) and dwell time (0.8, 1.6, 3.2, 6.4  $\mu$ s). Scale, 10  $\mu$ m, is  
284 also for (c). **c.** The surface profile obtained with 3D laser SCM shows the depression  
285 depth clearly. Measured depth (nm) is shown below each imaged square. Inlet graph at  
286 right bottom indicates averaged depression depth for each acceleration voltage. **d.**  
287 Depression depth at different acceleration voltages with different dwell times. **e.**  
288 Electron dose for each imaging condition. **f.** Depression depth at different dwell times  
289 with different acceleration voltages. **g.** Electron dose for each imaging condition.  
290 Electron dose rate ( $e^- \text{ nm}^{-2} \mu\text{s}^{-1}$ ) is shown at right of each acceleration voltage.

291

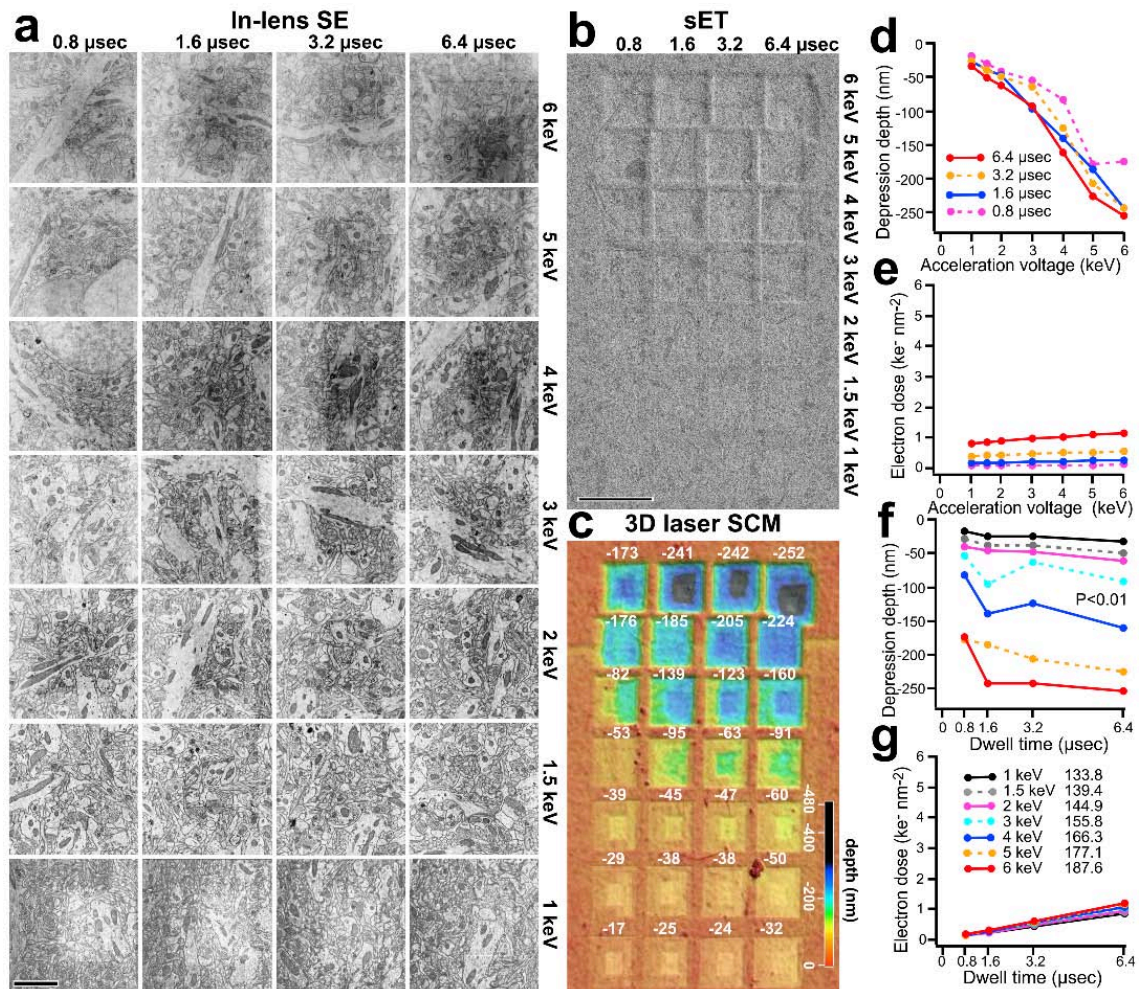

292

293 Supplementary Figure 5

294 Image quality varied with different acceleration voltage strengths and dwell times using  
 295 an In-lens SE with a single beam SEM.

296 **a.** Images of mHMS-treated brain tissue are captured with an In-lens SE for 2048 x  
 297 2048 pixel image size, 3 nm pixel<sup>-1</sup>, aperture 20 μm, with different acceleration voltage  
 298 strengths (1 - 6 keV) and dwell times (0.8 μs - 6.4 μs) using an optimized working  
 299 distance (4.0 mm: 6 keV - 4 keV, 4.1 mm: 3 keV - 1 keV) on the CNT tape. Some  
 300 regions showing a darkening were focusing squares result of a thin layer of carbon  
 301 adventitious build up, but not seen in 1.5 keV. In addition, a contrast reversal is  
 302 apparent in the 1 kV images is seen. Scale, 2 μm. **b.** Low magnification image captured  
 303 with the sET detector shows depression of the tissue section surface by images captured  
 304 with the In-lens SE with the different acceleration voltages and the dwell time. Scale, 10  
 305 μm, is also for (c). **c.** The surface profile obtained with 3D laser SCM shows the  
 306 depression depth clearly. **d.** Depression depth at different acceleration voltages with

307 different dwell times. **e.** Electron dose for each imaging condition. **f.** Depression depth  
308 at different dwell times with different acceleration voltages. **g.** Electron dose for each  
309 imaging condition. Electron dose rate ( $e^- \text{ nm}^{-2} \mu\text{s}^{-1}$ ) is shown at right of each acceleration  
310 voltage.

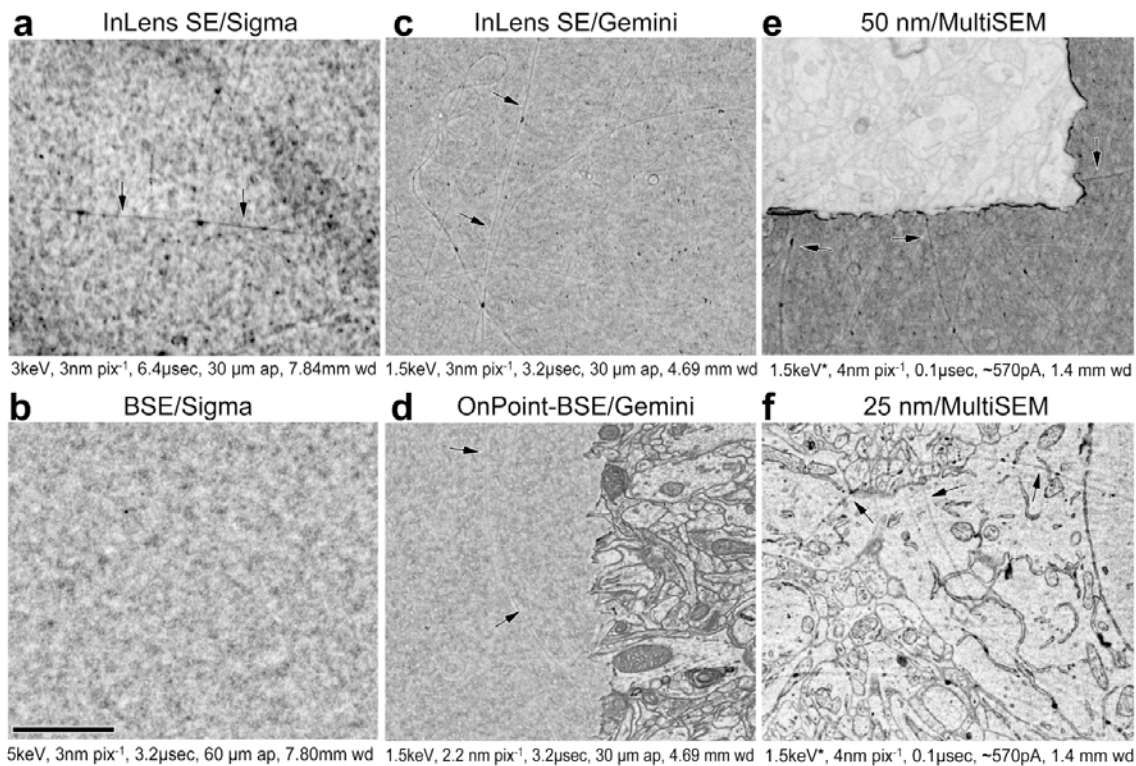

311

312 **Supplementary Figure 6**

313 The CNT tape surface is almost uniform and CNTs are observed and transparently seen  
 314 under some imaging conditions.

315 **a.** Surface structure of the CNT tape imaged with an In-lens SE detector in Sigma SEM.  
 316 Only thick CNTs are observed (arrows). **b.** Surface structure of the CNT tape imaged  
 317 with a BSD in Sigma SEM. **c.** Surface structure of the CNT tape imaged using In-lens  
 318 SE detector with the stage bias potential in Gemini SEM. Many CNTs are observed  
 319 (arrows). **d.** Surface structure of the CNT tape (left half) and brain tissue image from a  
 320 50 nm thick section on the tape (right half) captured with OnPoint-BSD in Gemini SEM.  
 321 CNTs are observed in low contrast (arrows). **e.** Surface structure of the CNT tape  
 322 (bottom half) and brain tissue image from a 50 nm thick section on the tape (upper left)  
 323 captured with MultiSEM. CNTs are observed only on the surface of the tape (arrows). **f.**  
 324 Brain tissue image from a 25 nm thick section prepared according to Hua et al.<sup>9</sup>  
 325 collected on CNT tape and captured with a 61 beam MultiSEM. CNTs are translucently  
 326 observed in the tissue (arrows). Scale in **(b)**, 2 μm, is also for **(a, c-f)**.

327

328

329



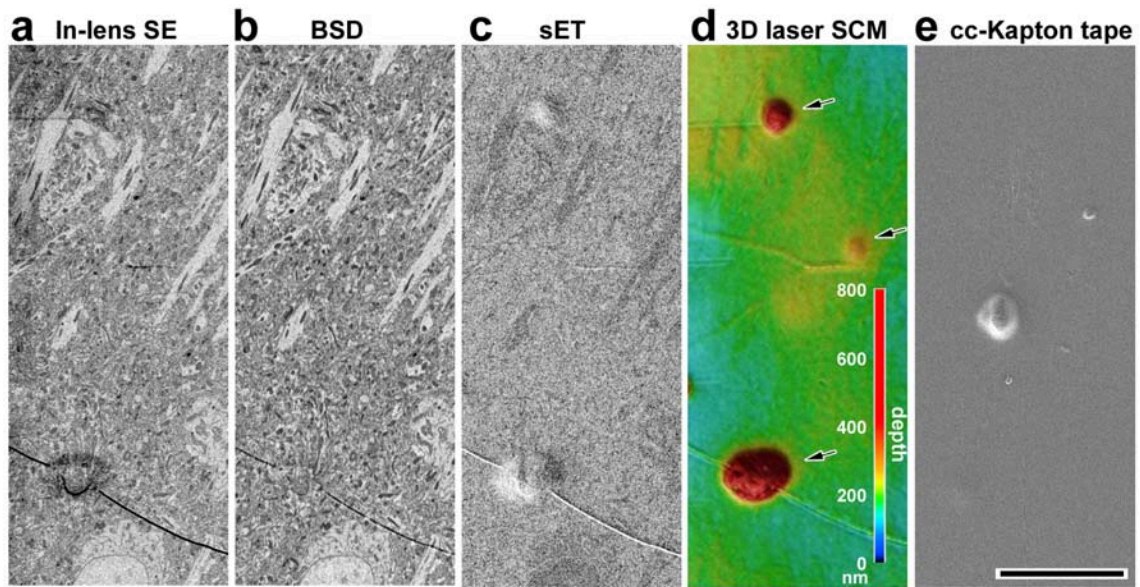

330

331 Supplementary Figure 7

332 Surface irregularities of the cc-Kapton tape have a slightly adverse effect on image  
 333 quality.

334 **a.** Tissue image captured with In-lens SE detector, **b.** with BSD, **c.** with sET, **d.** with 3D  
 335 laser SCM. Some part of the tissue section show bumps presumably caused by small  
 336 carbon particle balls (arrows in d), which are seen in image obtained with In-lens SE  
 337 detector (**a**) and sET (**c**), but not with BSD (**b**). **e.** Bumps in the different part of the cc-  
 338 Kapton tape captured with sET. Scale in (**e**), 10  $\mu\text{m}$ , is also for (**a-d**)).

339

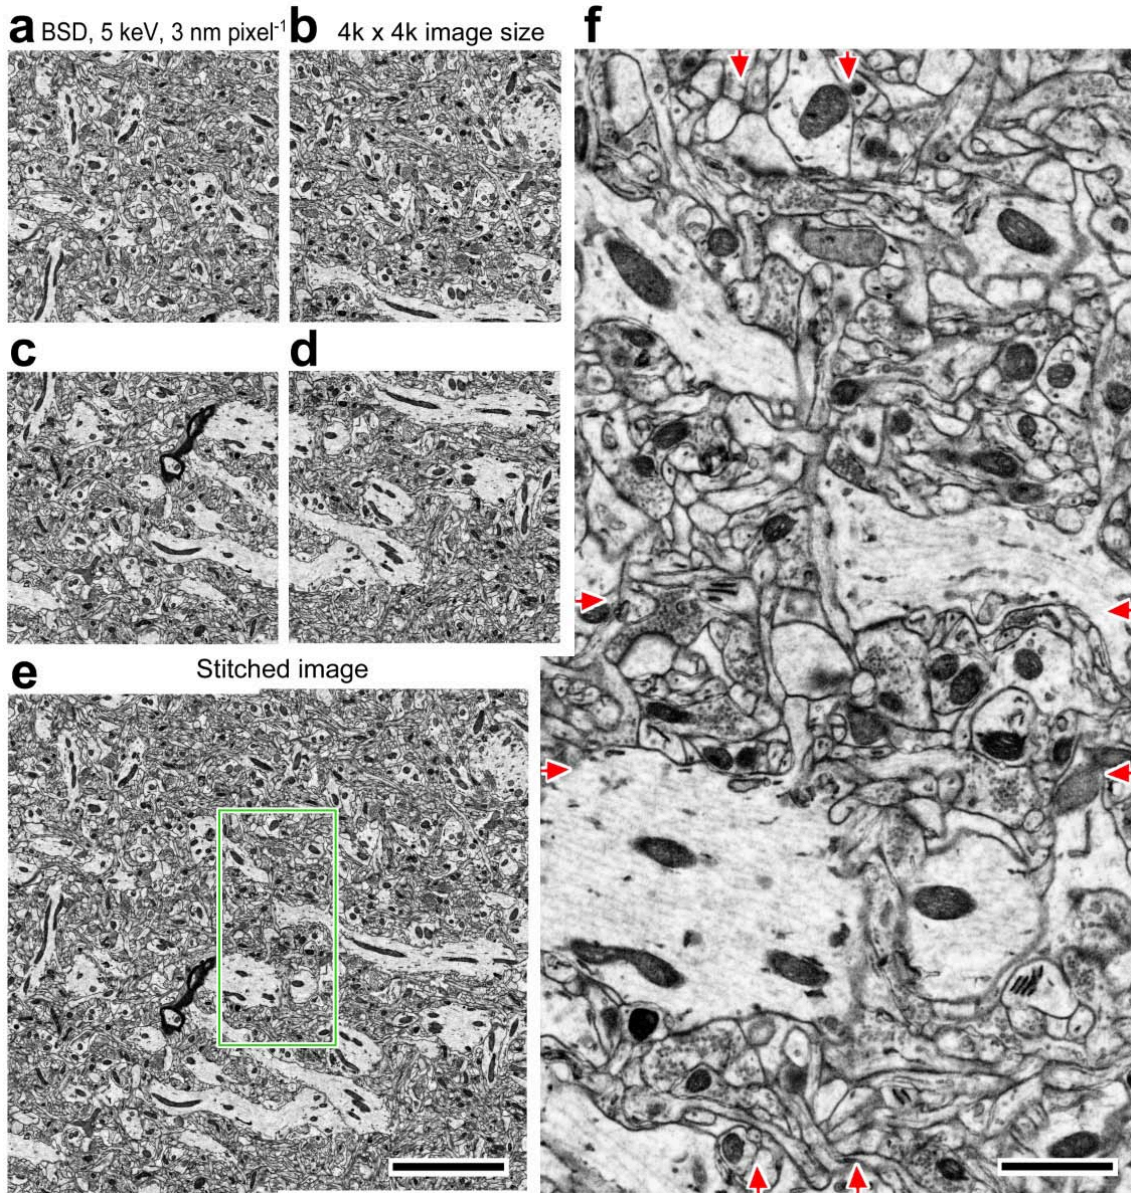

340

341 Supplementary Figure 8

342 Stitching image tiles can be done without any noticeable gap or seam.

343 **a-d.** Tile images (2 x 2) of the mHMS ultrathin section of cortex captured with BSD for

344 3.2  $\mu$ s dwell time, 3 nm pixel<sup>-1</sup>, 60 nm aperture at 5 keV, 2.8 ke<sup>-</sup> nm<sup>-2</sup> electron. **e.**

345 Stitched tiles. Scale, 5  $\mu$ m, is for (**a-d**). **f.** Enlarged image of rectangle in e shows

346 possible seams (red arrows). No noticeable seams are observed. Scale. 1  $\mu$ m.

347



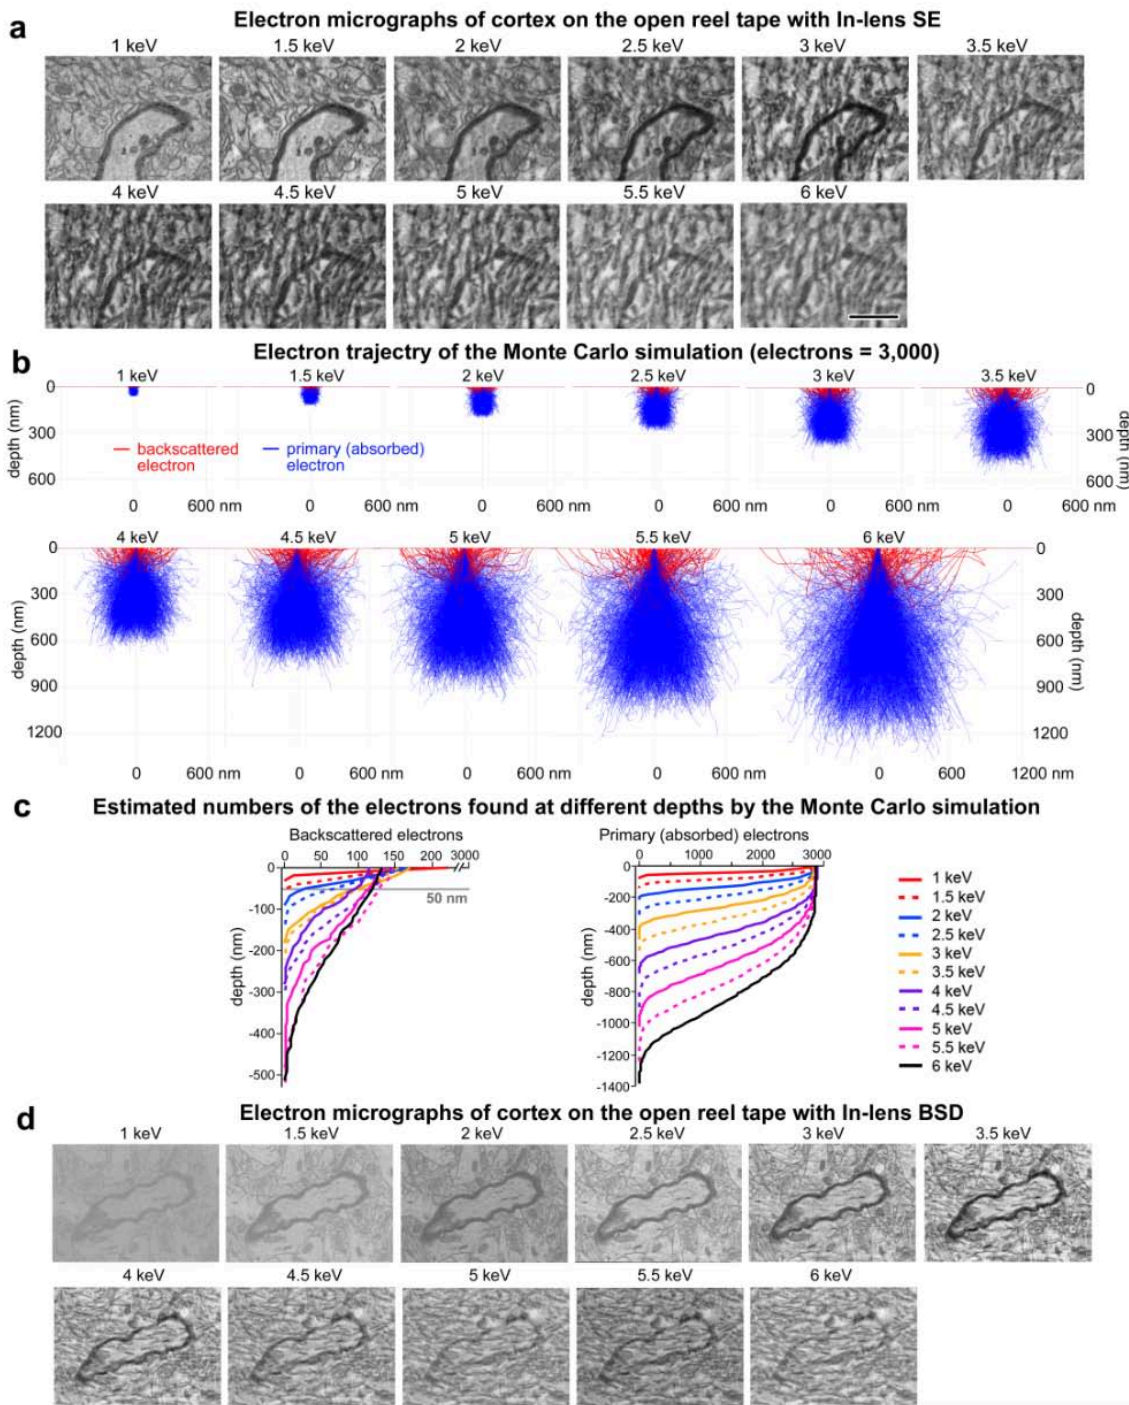

348

349 Supplementary Figure 9

350 Interaction volume of primary and BSEs for different acceleration voltages can be  
 351 estimated with electron tracks by Monte Carlo simulation

352 **a.** Image of an ultrathin section of mHMS-treated brain tissue on open reel tape  
 353 captured with In-lens SE detector at different acceleration voltages (**a.** 1 keV - **k.** 6 keV).

354 Scale, 1  $\mu\text{m}$ , is also for (**d**). **b.** Monte Carlo simulation. Blue lines show primary

355 (absorbed) electron tracks and red lines show BSE tracks with different acceleration  
356 voltages. **c.** Estimated numbers of the electrons in different acceleration voltages found  
357 at different depth. **d.** Image of an ultrathin section of mHMS-treated brain tissue on  
358 open reel tape captured with BSD at different acceleration voltages (**a.** 1 keV - **k.** 6  
359 keV). BSE: backscattered electron, PE: primary electron.  
360

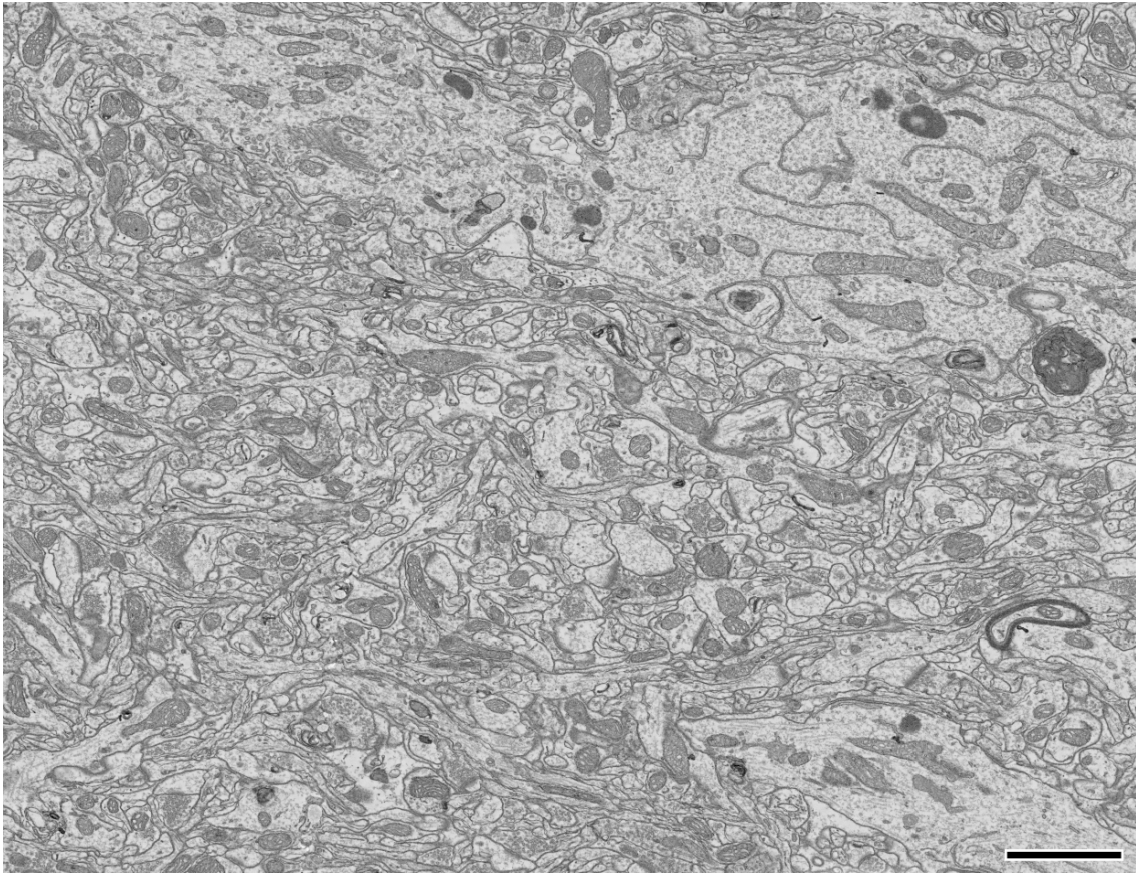

361

362 Supplementary Figure 10

363 High-resolution brain tissue image made with the TOLA protocol and lead citrate  
364 section staining captured using a BSD optimized for low accelerating voltage (OnPoint  
365 BSD, Gatan Inc.) with  $3.2 \mu\text{s}$  dwell time,  $1 \text{ nm pixel}^{-1}$ ,  $5 \text{ mm}$  working distance,  $30 \mu\text{m}$   
366 aperture at  $1.5 \text{ keV}$ . Scale,  $2 \mu\text{m}$ .

367

368

369

370

371

372

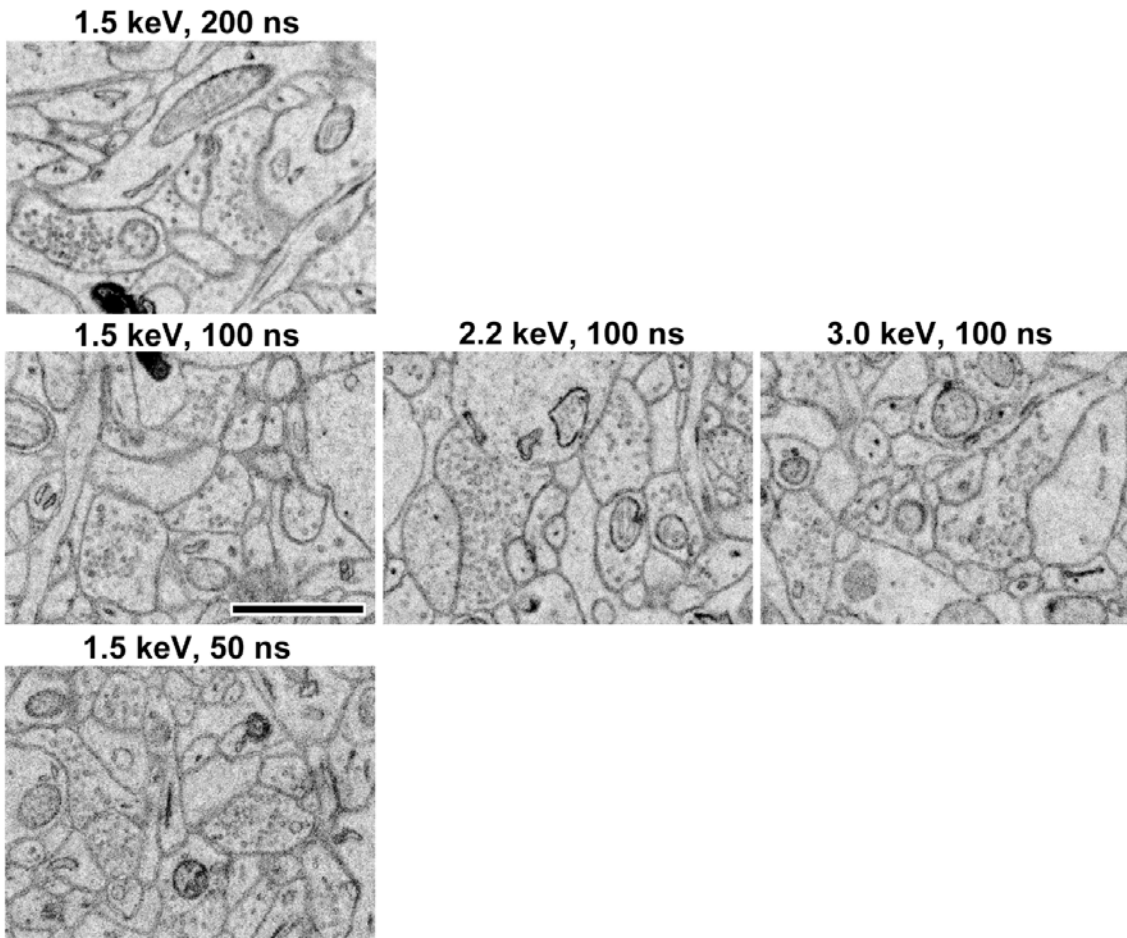

373

374 Supplementary Figure 11

375 Image quality varies with different acceleration voltage strengths and dwell times using  
376 a MultiSEM.

377 The images were taken from a 35 nm-thick section of *en-bloc* stained cortical mouse  
378 brain tissue at a pixel size of 4 nm. Scale, 1  $\mu\text{m}$ .

379

380

Repeated images with MSEM

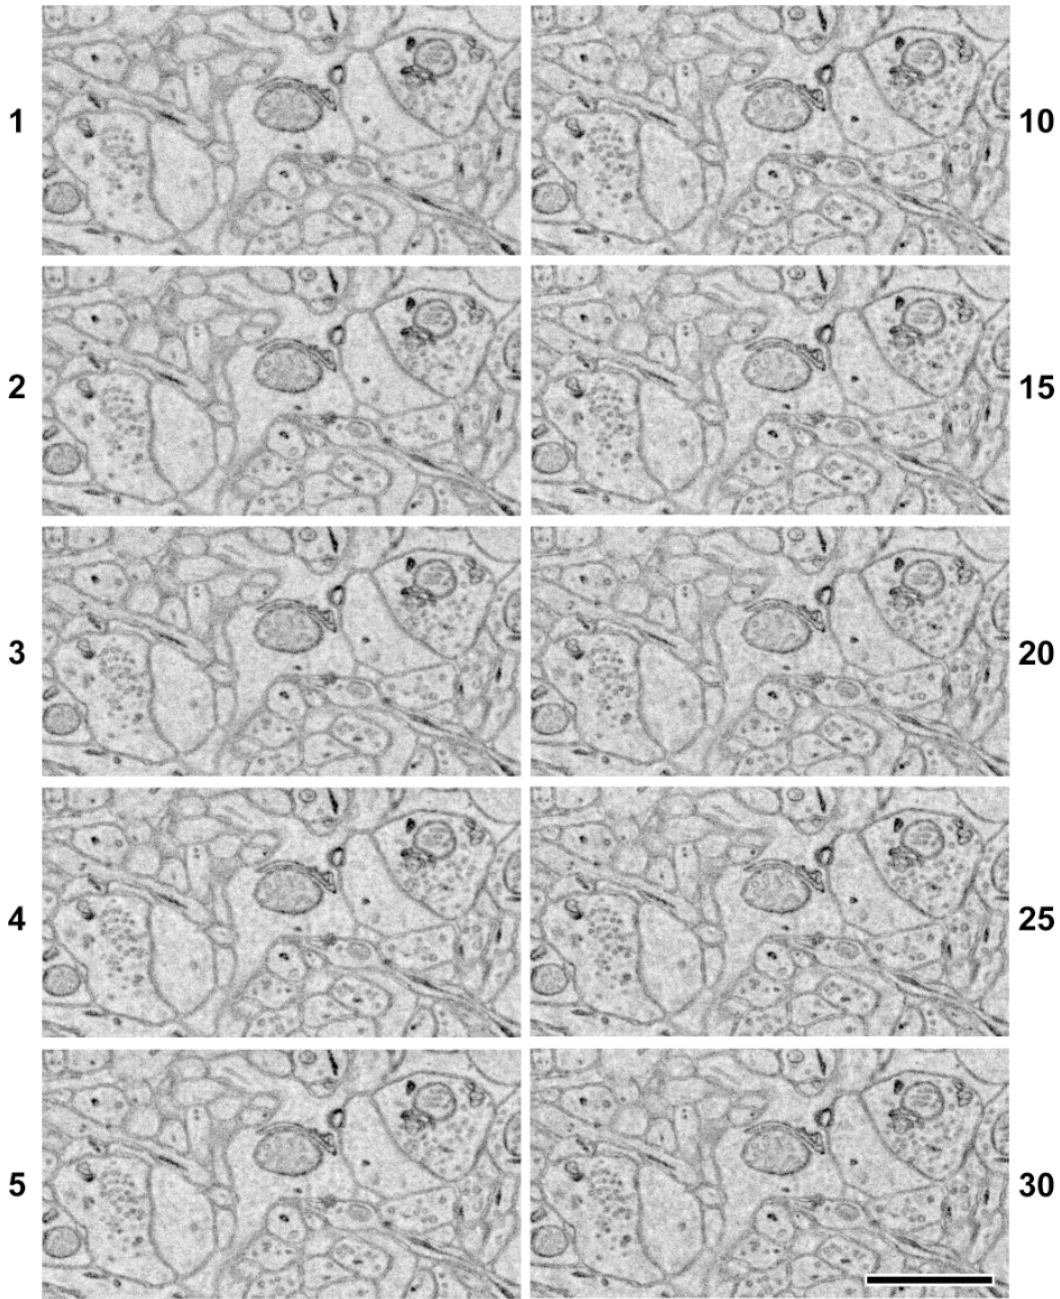

381 1.5 keV\*, 4 nm pixel<sup>-1</sup>, 0.1 μsec dt, ~570 pA, 1.4 mm wd, 35 nm thick section

382 Supplementary Figure 12

383 Multiple exposures in the MultiSEM do not greatly affect image quality

384 The images were taken from a 35 nm-thick section of *en-bloc* stained cortical mouse

385 brain tissue using an acceleration voltage of 1.5 keV, a pixel size of 4 nm and a pixel

386 dwell time of 100 ns. The number on the side of the image indicates instances of

387 repeated imaging. Scale, 1 μm. wd, working distance; dt, dwell time.

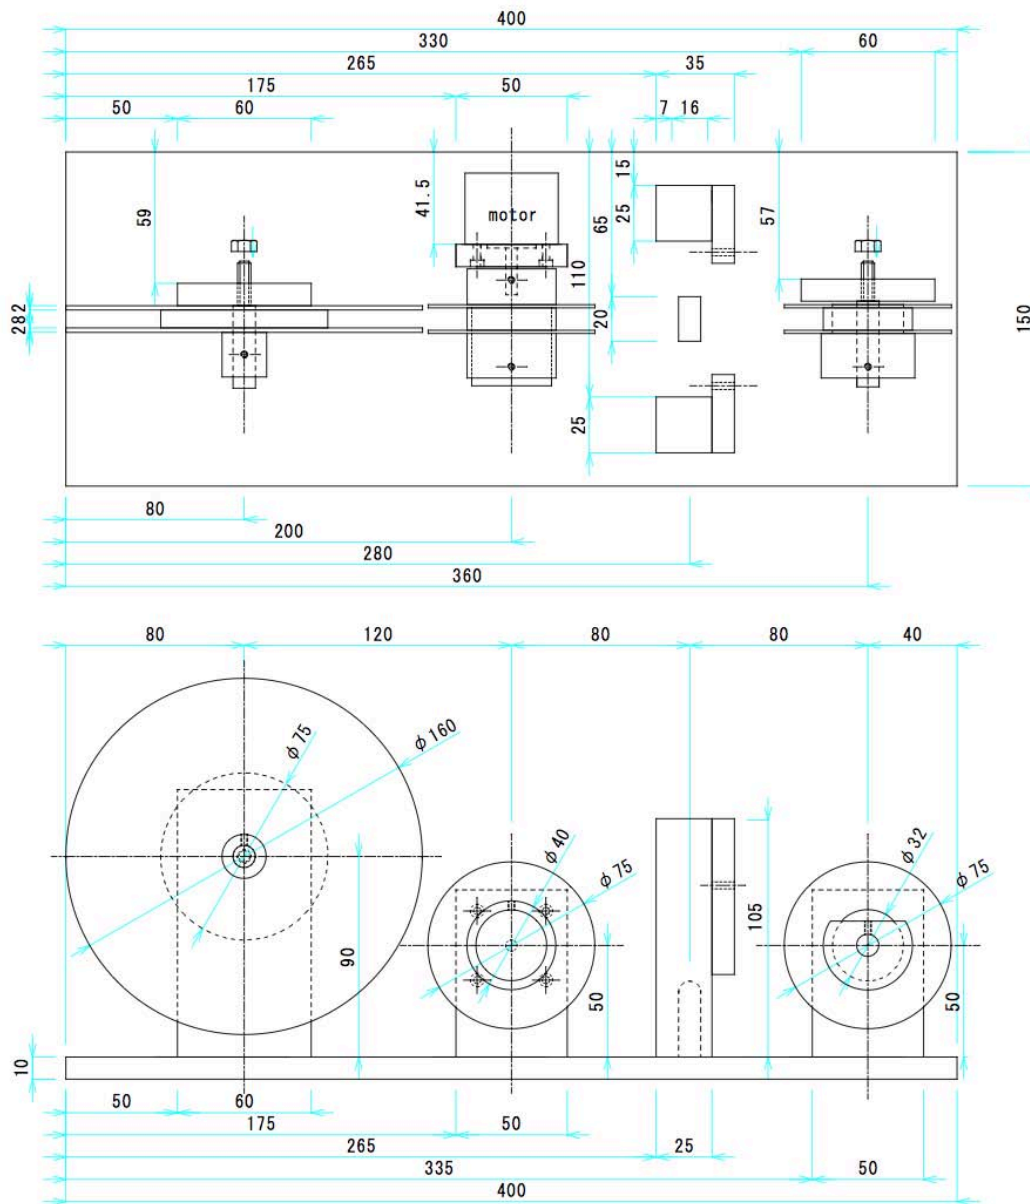

388

389 Supplementary Figure 13

390 Sketch of the reel-to-reel motorized winder for plasma discharge treatment. The unit of  
 391 the numerical value is mm.

392

393



394 Supplementary Tables

**Supplementary Table 1 Specification of Tapes**

| Tape material | Coated material   | Company                      | Thickness (µm) | Commercial product |             |                                    | Sheet resistance ( $\Omega \square^{-1}$ ) | Total light transmission (%) | URL                                                                                                                                                                                                                                         |
|---------------|-------------------|------------------------------|----------------|--------------------|-------------|------------------------------------|--------------------------------------------|------------------------------|---------------------------------------------------------------------------------------------------------------------------------------------------------------------------------------------------------------------------------------------|
|               |                   |                              |                | Tape (8mm width)   | Film        | Product name                       |                                            |                              |                                                                                                                                                                                                                                             |
| Kapton HN     | none              | DuPont                       | 50             | n/a                | available   | Kapton HN                          | $1 \times 10^{16}$                         | 72.2                         | <a href="http://www.dupont.com/products-and-services/membranes-films/polyimide-films/brands/kapton-polyimide-film.html/">http://www.dupont.com/products-and-services/membranes-films/polyimide-films/brands/kapton-polyimide-film.html/</a> |
|               | carbon            | RMC Boeckeler                | 50             | available          | none        |                                    | 19.2/107<br>$6,530 \times 10^6$            | 47.9                         | <a href="http://www.rmcbocckeler.com">http://www.rmcbocckeler.com</a>                                                                                                                                                                       |
|               | germanium         | Sheldahl                     | 50             | n/a                | available   | IP# C903907-1                      | n/a                                        | none                         | <a href="http://www.sheldahl.com/default.aspx">http://www.sheldahl.com/default.aspx</a>                                                                                                                                                     |
| Copper foil   | none              | Takeuchi Metal Foil & Powder | 20             | n/a                | available   |                                    | 0.1                                        | none                         | <a href="http://www.etakeuchi.co.jp">http://www.etakeuchi.co.jp</a>                                                                                                                                                                         |
|               |                   |                              | 40             | n/a                | available   |                                    | 0.1                                        | none                         |                                                                                                                                                                                                                                             |
| Open reel     | magnetic crystals | EMG International            | 50             | available          | n/a         | Studio Master SM911 1/4 inch width | n/a                                        | none                         | <a href="http://www.rmg.nl">www.rmg.nl</a><br><a href="http://www.recordingdataservice.com/default.asp">http://www.recordingdataservice.com/default.asp</a>                                                                                 |
| PET           | ITO               | TDK                          | 53             | n/a                | available   | Fleclear                           | 155                                        | 90.1                         | <a href="http://www.tdk.co.jp/index.htm">http://www.tdk.co.jp/index.htm</a>                                                                                                                                                                 |
|               |                   | Teijin                       | 50             | n/a                | available   | Eleclear                           | 150                                        | 89.6                         | <a href="https://www.teijin.com">https://www.teijin.com</a>                                                                                                                                                                                 |
|               | CNT               | Toray                        | 50             | n/a                | not on sale |                                    | 240/500                                    | 88.4                         | <a href="http://www.toray.com">http://www.toray.com</a>                                                                                                                                                                                     |
|               |                   | Teijin                       | 50             | n/a                | not on sale |                                    | 800/1,000                                  | 86.2                         | <a href="https://www.teijin.com">https://www.teijin.com</a> , commercially available by RMC in 2018                                                                                                                                         |

395

396

**Supplementary Table 2 Depth of the electrons reached and signal efficiency for a 50 nm thick section**

| Acceleration voltage |     | 1     | 1.5  | 2    | 2.5  | 3    | 3.5  | 4    | 4.5  | 5     | 5.5  | 6     |
|----------------------|-----|-------|------|------|------|------|------|------|------|-------|------|-------|
| DER (nm)             | BSE | -25   | -53  | -89  | -130 | -173 | -217 | -274 | -293 | -474  | -517 | -504  |
|                      | PE  | -70   | -137 | -206 | -301 | -467 | -570 | -763 | -897 | -1016 | 1231 | -1375 |
| SEF50 (%)            |     | 100.0 | 99.5 | 83.0 | 57.4 | 40.4 | 30.3 | 15.7 | 18.9 | 14.8  | 12.8 | 9.8   |

DER: Depth of the electrons reached; BSE: backscattered electron; PE: Primary electron

SEF50: Signal efficiency for a 50 nm thick section

397

398

**Supplementary Table 3 Michelson contrast and Contrast-to-noise ratio**

| Detector                   | BSE        |       |       |       |       |       |  |
|----------------------------|------------|-------|-------|-------|-------|-------|--|
| Acceleration voltage (keV) | 2          | 3     | 4     | 5     | 6     | 7     |  |
| Michelson contrast         | 0.277      | 0.374 | 0.376 | 0.272 | 0.302 | 0.273 |  |
| Contrast-to-noise ratio    | 0.144      | 0.209 | 0.208 | 0.211 | 0.199 | 0.193 |  |
| Detector                   | In-Lens SE |       |       |       |       |       |  |
| Acceleration voltage (keV) | 1          | 1.5   | 2     | 3     | 4     | 5     |  |
| Michelson contrast         | 0.156      | 0.231 | 0.246 | 0.211 | 0.180 | 0.168 |  |
| Contrast-to-noise ratio    | 0.145      | 0.202 | 0.219 | 0.195 | 0.161 | 0.141 |  |

399

400

401 **Supplementary References**

- 402 1 Hayworth, K. J., Kasthuri, N., Schalek, R. & Lichtman, J. W. Automating the  
403 collection of ultrathin serial sections for large volume TEM reconstructions.  
404 *Microsc Microanal* **13**, 86-87 (2006).
- 405 2 Kasthuri, N. *et al.* Saturated Reconstruction of a Volume of Neocortex. *Cell* **162**,  
406 648-661 (2015).
- 407 3 Mikuni, T., Nishiyama, J., Sun, Y., Kamasawa, N. & Yasuda, R. High-  
408 Throughput, High-Resolution Mapping of Protein Localization in Mammalian  
409 Brain by In Vivo Genome Editing. *Cell* **165**, 1803-1817 (2016).
- 410 4 Drouin, D. *et al.* CASINO V2.48: a fast and easy-to-use modeling tool for  
411 scanning electron microscopy and microanalysis users. *Scanning* **29**, 92-101  
412 (2007).
- 413 5 Reimer, L. *Image Formation in Low-Voltage Scanning Electron Microscopy*. 2-  
414 3 (SPIE Press, 1993).
- 415 6 Scipioni, R. *et al.* Electron microscopy investigations of changes in morphology  
416 and conductivity of LiFePO<sub>4</sub>/C electrodes. *J Power Sources* **307**, 259-269  
417 (2016).
- 418 7 Bower, J. C. *et al.* Deceleration of probe beam by stage bias potential improves  
419 resolution of serial block-face scanning electron microscopic images. *Adv Struct*  
420 *Chem Imaging* **2**, 11 (2017).
- 421 8 Ohta, K. *et al.* Beam deceleration for block-face scanning electron microscopy  
422 of embedded biological tissue. *Micron* **43**, 612-620 (2012).
- 423 9 Hua, Y., Laserstein, P. & Helmstaedter, M. Large-volume *en-bloc* staining for  
424 electron microscopy-based connectomics. *Nat Commun* **6**, 7923 (2015).
- 425
