# Supplementary material for: A carbon nanotube tape for serial-section electron microscopy of brain ultrastructure
Source: PubMed Central journal article supplement (PMC5789869; doi:10.1038/s41467-017-02768-7), 2018-01-30
Supplement: 41467_2017_2768_MOESM3_ESM.pdf [file 41467_2017_2768_MOESM3_ESM.pdf]

### **Description of Supplementary Files**

File Name: Supplementary Movie 1

Description: Serial ultrathin section images with GABA post-embedding immunoreaction stained with 15nm colloidal gold particles of rat frontal cortex.
